# Supplementary material for: Solvothermal synthesis of pyrochlore-type cubic tungsten trioxide hemihydrate and high photocatalytic activity
Source: Royal Society of Chemistry journal article supplement (doi:10.1039/c3nj01401k), 2014-01-01
Supplement: c3nj01401k1.pdf [file c3nj01401k1.pdf]

Electronic Supplementary Information (ESI)

## Solvothermal synthesis of pyrochlore-type tungsten trioxide hemihydrate with high photocatalytic activity

Yi Zheng, Gang Chen,\* Yaoguang Yu, and Yansong Zhou

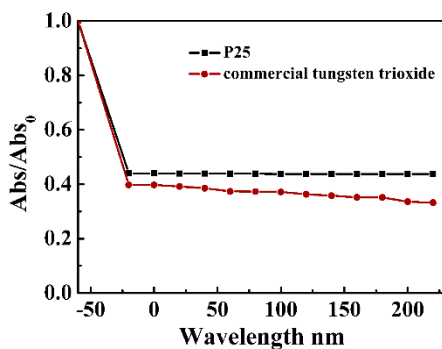

Figure S1 Degradation of RhB after visible light irradiation ( $\lambda > 400$  nm) by references

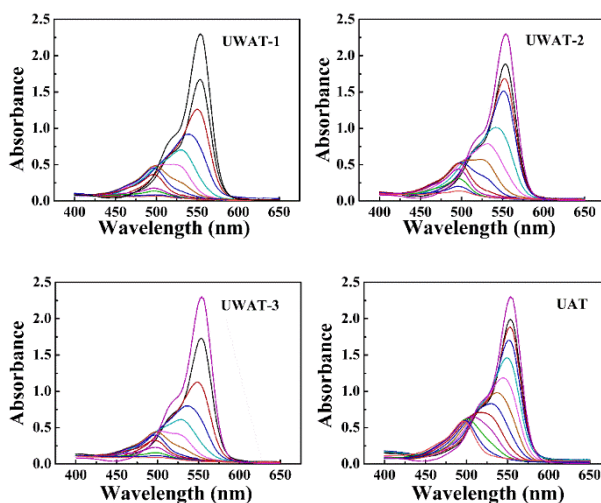

Figure S2 UV-vis adsorption spectral changes of the RhB solution ( $10 \text{ mg} \cdot \text{L}^{-1}$ ) over as-prepared samples by visible light irradiation ( $\lambda > 400$  nm).

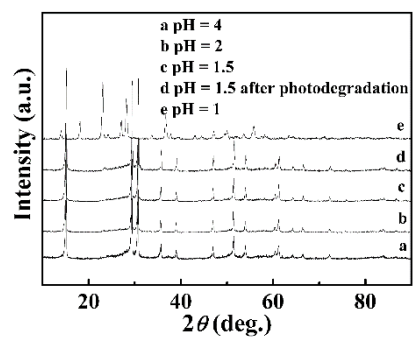

Fig. S3 X-ray diffraction (XRD) patterns of tungsten oxides prepared with different pH.
